# Supplementary material for: Excellent performance of Pt-free cathode in alkaline direct methanol fuel cell at room temperature
Source: Royal Society of Chemistry journal article supplement (doi:10.1039/c2ta01129h), 2013-01-01
Supplement: c2ta01129h.pdf [file c2ta01129h.pdf]

## Supporting Information

### Excellent performance of Pt-free cathode in alkaline direct methanol fuel cell at Room temperature

Gopal Krishna Goswami, Ravi Nandan, Barun Kumar Barman and Karuna Kar Nanda\*

*Materials Research Centre, Indian Institute of Science, Bangalore-560012, India.*

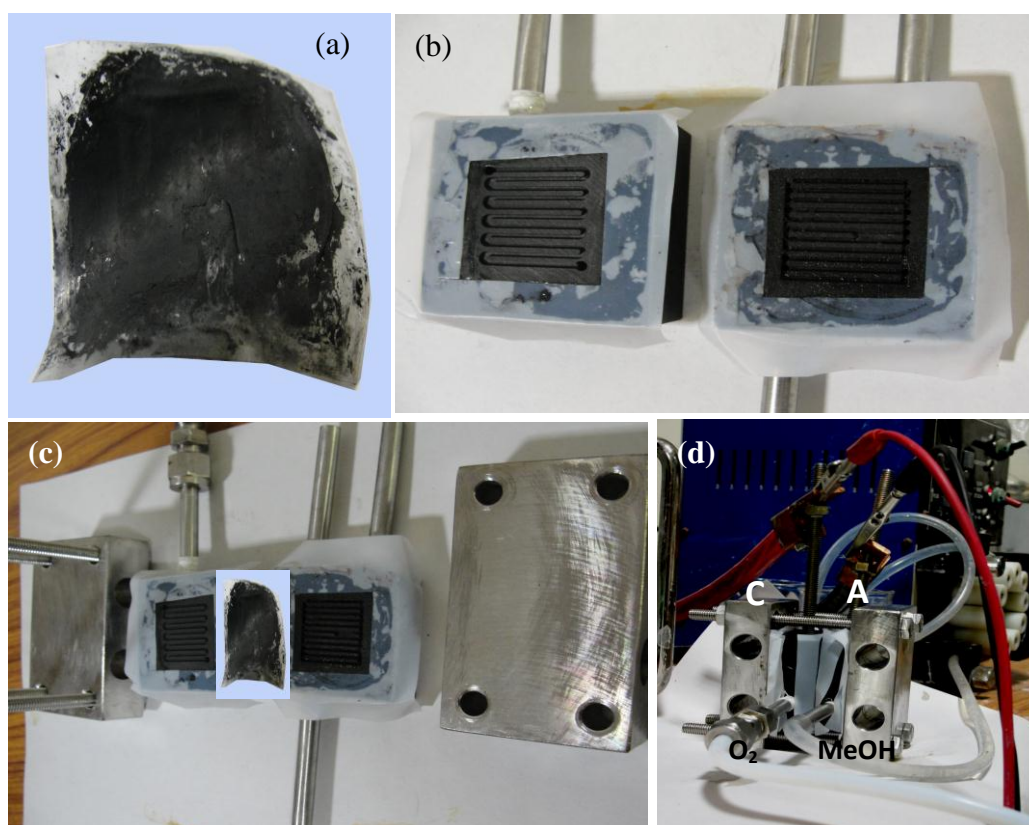

**Fig. S1** (a) Digital photograph of Nafion® membrane with the catalyst layer. (b) The home-made bipolar carbon plates (covered with Teflon spacer) with serpentine and parallel flow channels. Stainless steel flow tubes are connected for fuel/oxygen flow. (c) The different components of fuel cell device: stainless-steel plates, bipolar plates with Teflon spacer and

MEA. (d) The compacted fuel cell device. The different fluid flow path for oxygen (O<sub>2</sub>) and methanol (MeOH) is shown. Anode (A) and cathode (C) compartments are highlighted.

### **Mechanism of cell operation in Nafion® based ADMFC:**

It has been suggested<sup>1,2</sup> that the proton conducting Nafion® 117 can be converted to Na<sup>+</sup> ion conductor by simply treated with strong alkali like NaOH as has been adopted here. The electrolytic conduction occurs in this membrane via the transport of Na<sup>+</sup> ions from anode to cathode where the produced hydroxide ion from the reduction of oxygen readily reacts with Na<sup>+</sup> ion to maintain the electroneutrality as well as completes the electronic circuit. In addition, water is transported along with Na<sup>+</sup> ion from anode to cathode. The disadvantage associated with this process is that the ionic conductivity of this membrane would be lower than that of proton form of Nafion®. Hence, there will be a compromise between ionic conductivity and electrocatalytic activity at the electrodes.<sup>1</sup>

### **References:**

1. E. H. Yu, K. Scott and R. W. Reeve, *J. Appl. Electrochem.*, 2006, **36**, 25.
2. L. An and T. S. Zhao, *Energy Environ. Sci.*, 2011, **4**, 2213.
